# Supplementary material for: LRRK2 inhibition prevents endolysosomal deficits seen in human Parkinson’s disease
Source: PubMed Central journal article supplement — Neurobiol Dis. Author manuscript; Available in PMC 2020 Jul 9. (PMC7345850; doi:10.1016/j.nbd.2019.104626), 2019-10-13
Supplement: NIHMS1605249-supplement-Suppl_Table.pdf [file NIHMS1605249-supplement-Suppl_Table.pdf]

Supplemental Figures

**Table S1.** Human demographics

| <b>Control</b> | <b>Age</b>    | <b>Gender</b>  | <b>Postmortem Interval</b> | <b>Race</b> |
|----------------|---------------|----------------|----------------------------|-------------|
| CW96-047       | 70            | Male           | 6                          | Unknown     |
| CW98-032       | 75            | Male           | 10                         | White       |
| CW99-022       | 72            | Female         | 9                          | White       |
| CW00-026       | 91            | Female         | 7.5                        | White       |
| CW02-008       | 54            | Female         | 6                          | White       |
| CW03-003       | 88            | Female         | 4                          | White       |
| CW05-040       | 76            | Male           | 14                         | White       |
| CW05-175       | 76            | Male           | 20                         | White       |
| CW15-029       | 80            | Female         | 5                          | White       |
| CW16-028       | 90            | Male           | 9                          | White       |
|                | <b>77 ± 4</b> | <b>(5M/5F)</b> | <b>9.1 ± 1.5</b>           |             |

  

| <b>iPD</b> |               |                |                  |       |
|------------|---------------|----------------|------------------|-------|
| CW00-033   | 81            | Male           | 3                | White |
| CW04-021   | 62            | Female         | 11               | White |
| CW04-022   | 72            | Female         | 4                | White |
| CW05-022   | 84            | Male           | 4                | White |
| CW10-071   | 71            | Male           | 8                | White |
| CW15-032   | 78            | Female         | 14               | White |
| CW17-002   | 84            | Female         | 8                | White |
| CW17-013   | 95            | Male           | 17               | White |
|            | <b>78 ± 4</b> | <b>(4M/5F)</b> | <b>8.6 ± 1.8</b> |       |
